# Supplementary material for: Functional Characterization of the spf/ash Splicing Variation in OTC Deficiency of Mice and Man
Source: PubMed Central journal article supplement (PMC4390381; doi:10.1371/journal.pone.0122966), 2015-04-08

A

Wild-type mouse *Otc* gene sequence (exon 4 - exon 5)

A A A G T C T C A C A G A C A C C G C T C G T G T C T T A T C T A G C A T G A C A G A T G

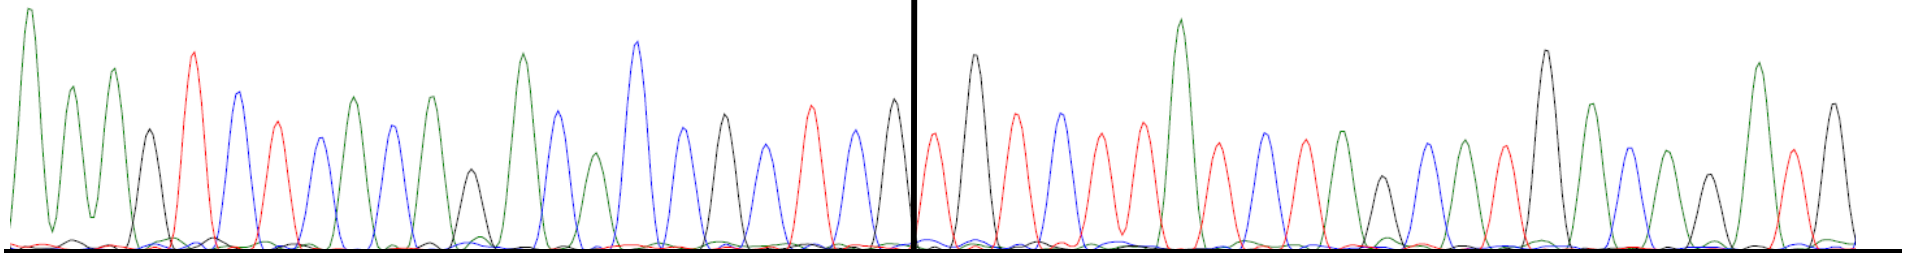

B

Mouse *Otc* gene sequence with the *spf-ash* mutation (exon 4 - intron 4/exon 5)

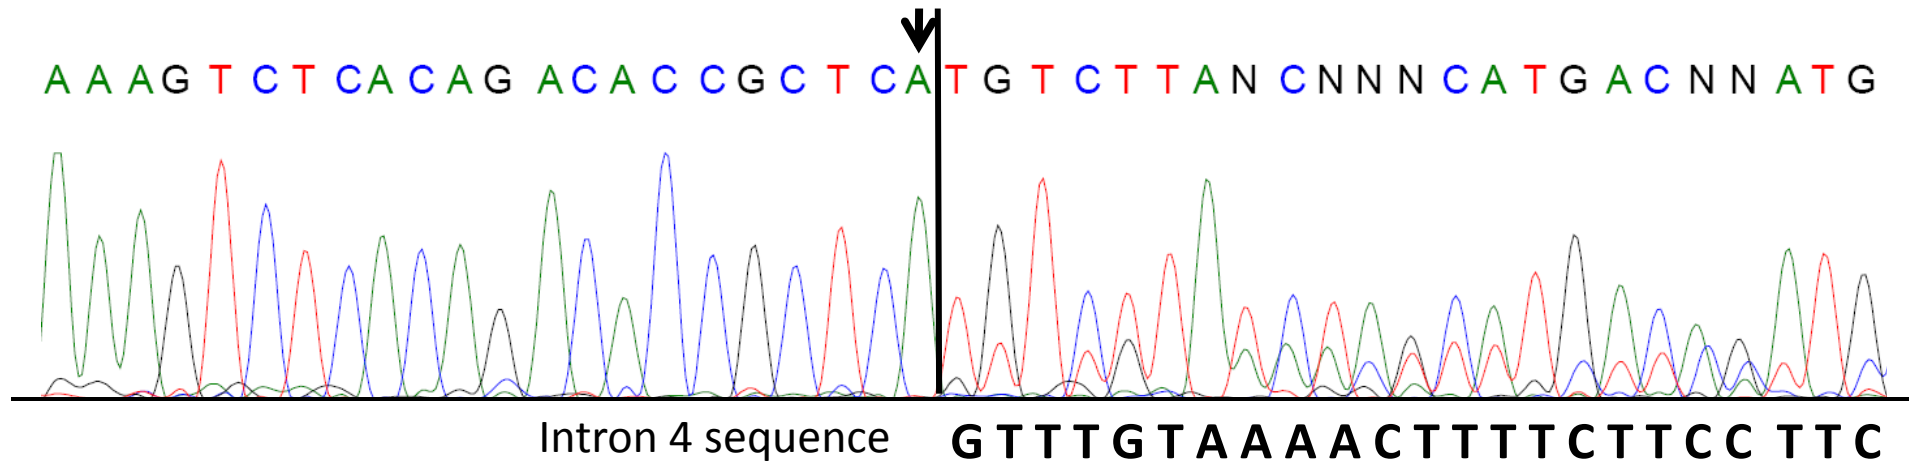

↓ G to A missense mutation

C

Wild-type human *OTC* gene sequence (exon 4 – exon 5)

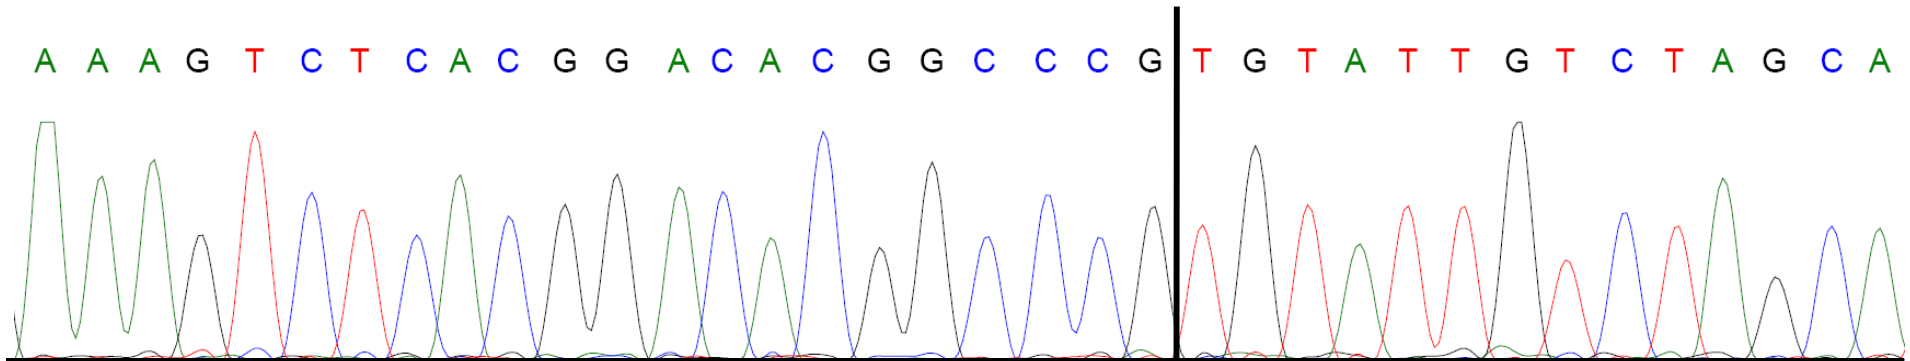

D

Human *OTC* gene sequence with the mutation c.38G>A/p.R129H (exon 3 – exon 5 and exon 4 – intron 4/exon 5)

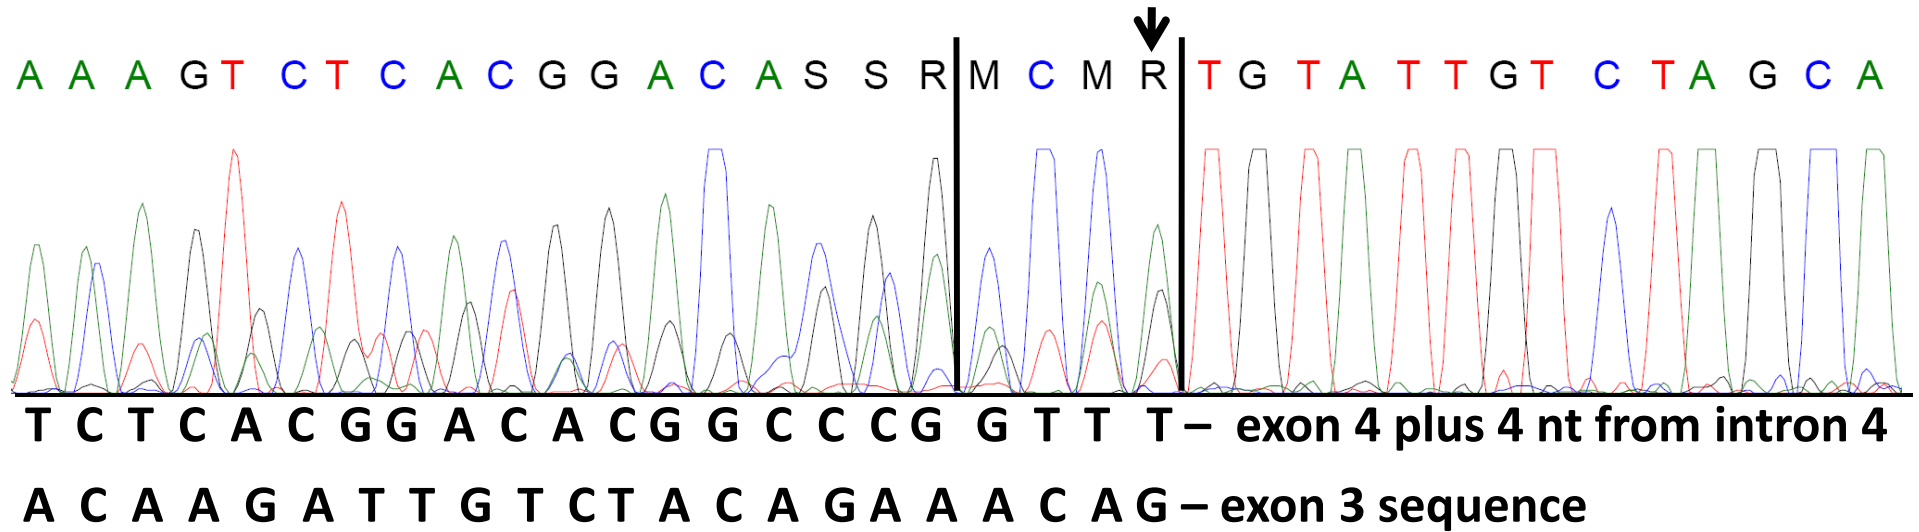

↓ G to A missense mutation

E

Human *OTC* gene sequence with exon 4 skipping (exon 3 – exon 5)

A C A A G A T T G T C T A C A G A A A C A G | T G T A T T G T C T A G C A

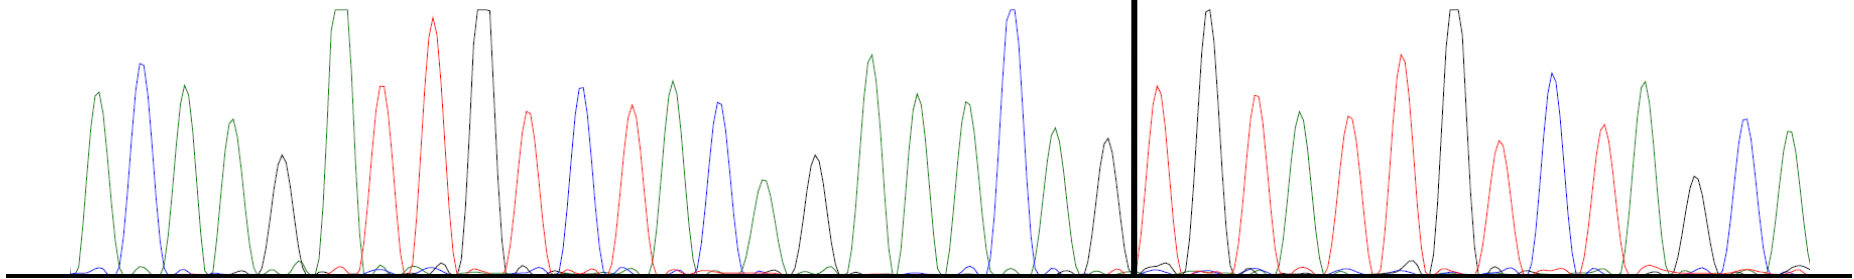

Supplement: pone.0122966.s001.pdf [file pone.0122966.s001.pdf]
